# Supplementary material for: Identification, Characterization and Synthesis of Walterospermin, a Sperm Motility Activator from the Egyptian Black Snake Walterinnesia aegyptia Venom
Source: Int J Mol Sci. 2020 Oct 21;21(20):7786. doi: 10.3390/ijms21207786 (PMC7594068; doi:10.3390/ijms21207786)
Supplement: Supplementary file 1 [file ijms-21-07786-s001.xlsx]

## Sheet: Feuil1
Time (minutes)	0	60	120	180	240	300	360
Control 1	71	59	54	49	44	40	34
Control 2	68	58	54	46	42	36	29
Control 3	69	55	51	48	43	37	30
mean Control	69.3333	57.3333	53	47.6667	43	37.6667	31
Cy5-Walter 1	71	61	55	49	44	40	35
Cy5-Walter 2	68	58	52	48	43	35	29
Cy5-Walter 3	69	58	53	48	44	35	30
mean Cy5-Walter	69.3333	59	53.3333	48.3333	43.6667	36.6667	31.3333
% Control 1 VS T0	100	83.0986	76.0563	69.0141	61.9718	56.338	47.8873
% Control 2 VS T0	100	85.2941	79.4118	67.6471	61.7647	52.9412	42.6471
% Control 3 VS T0	100	79.7101	73.913	69.5652	62.3188	53.6232	43.4783
mean % Control	100	82.701	76.4604	68.7421	62.0185	54.3008	44.6709
% Cy5-Walter 1 VS T0	100	85.9155	77.4648	69.0141	61.9718	56.338	49.2958
% Cy5-Walter 2 VS T0	100	85.2941	76.4706	70.5882	63.2353	51.4706	42.6471
% Cy5-Walter 3 VS T0	100	84.058	76.8116	69.5652	63.7681	50.7246	43.4783
mean % Cy5-Walter	100	85.0892	76.9157	69.7225	62.9917	52.8444	45.1404
